# Supplementary material for: Anti-Acne Action of Peptides Isolated from Burdock Root—Preliminary Studies and Pilot Testing
Source: PubMed Central journal article supplement (PMC7248785; doi:10.3390/molecules25092027), 2020-04-27

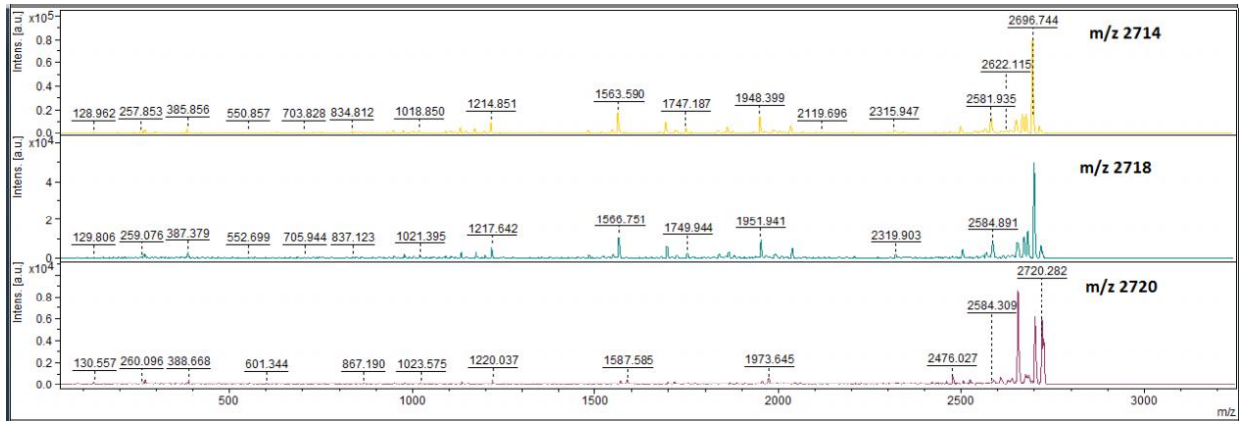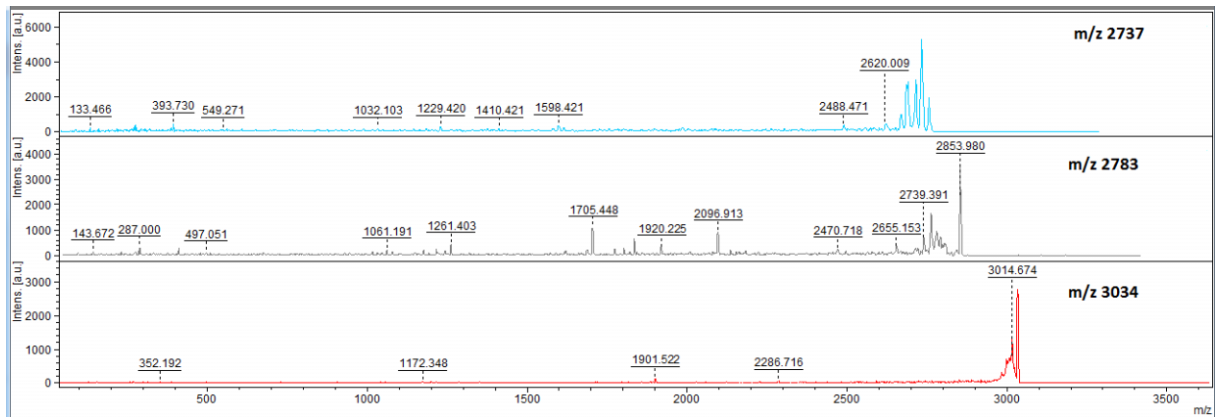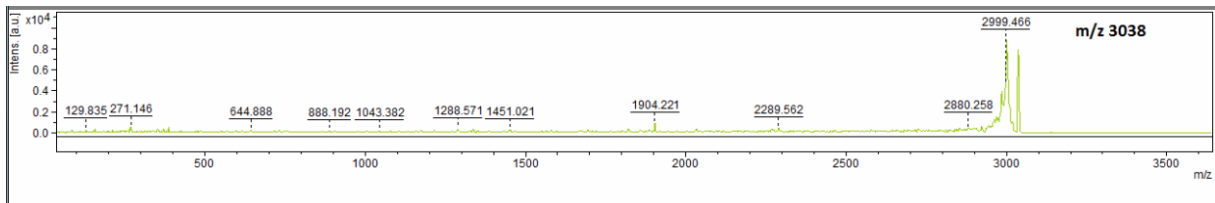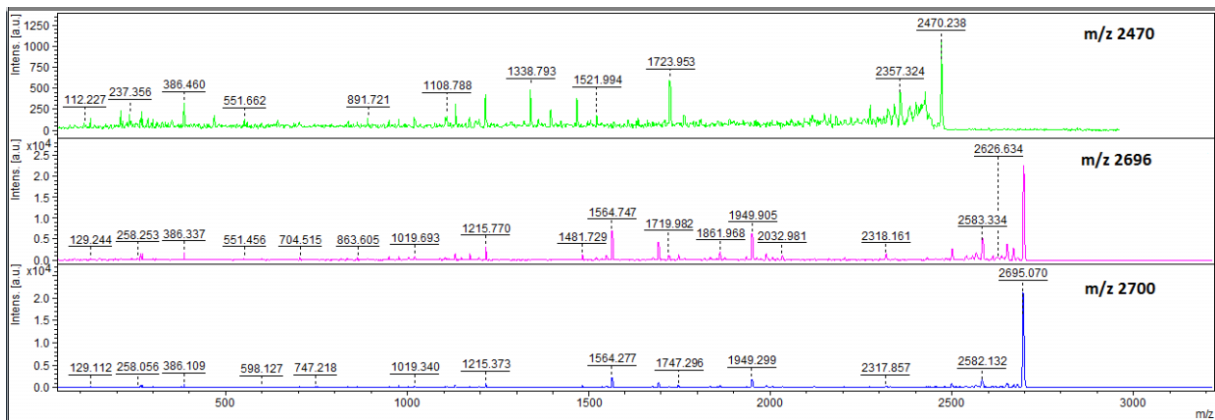

Supplement: molecules-25-02027-s001.pdf [file molecules-25-02027-s001.pdf]
